# Supplementary material for: A brief morning rest period benefits cardiac repair in pressure overload hypertrophy and postmyocardial infarction
Source: PubMed Central journal article supplement (PMC9746813; doi:10.1172/jci.insight.164700), 2022-11-22
Supplement: jciinsight-7-164700-s256.pdf [file jciinsight-7-164700-s256.pdf]

## Supplemental Material

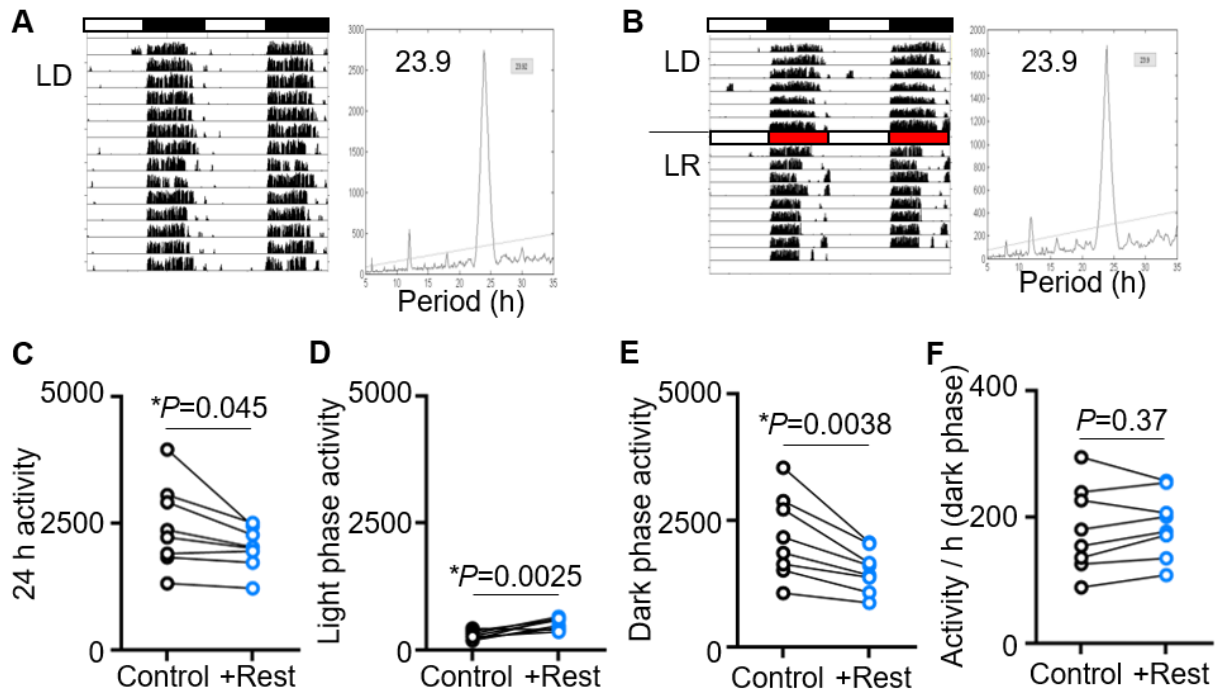

**Supplemental Figure 1. Day-night activity rhythms.** (A) Running wheel actigraphy (left) and periodogram quantification (right) of 24 h locomotor activity under a normal LD 12:12 cycle, and (B) similar activity profiles under 12 h light: 12 h red light (>620 nm) (LR).  $n=5$  mice/group. (C) Radiotelemetry data of total 24 h activity, (D) light phase activity, (E) dark phase activity, and (F) activity/hour over the dark phase, in healthy mice under control LD 12:12 or the rest model.  $n=8$  mice/group. \* $P<0.05$  by paired Student's  $t$ -test.

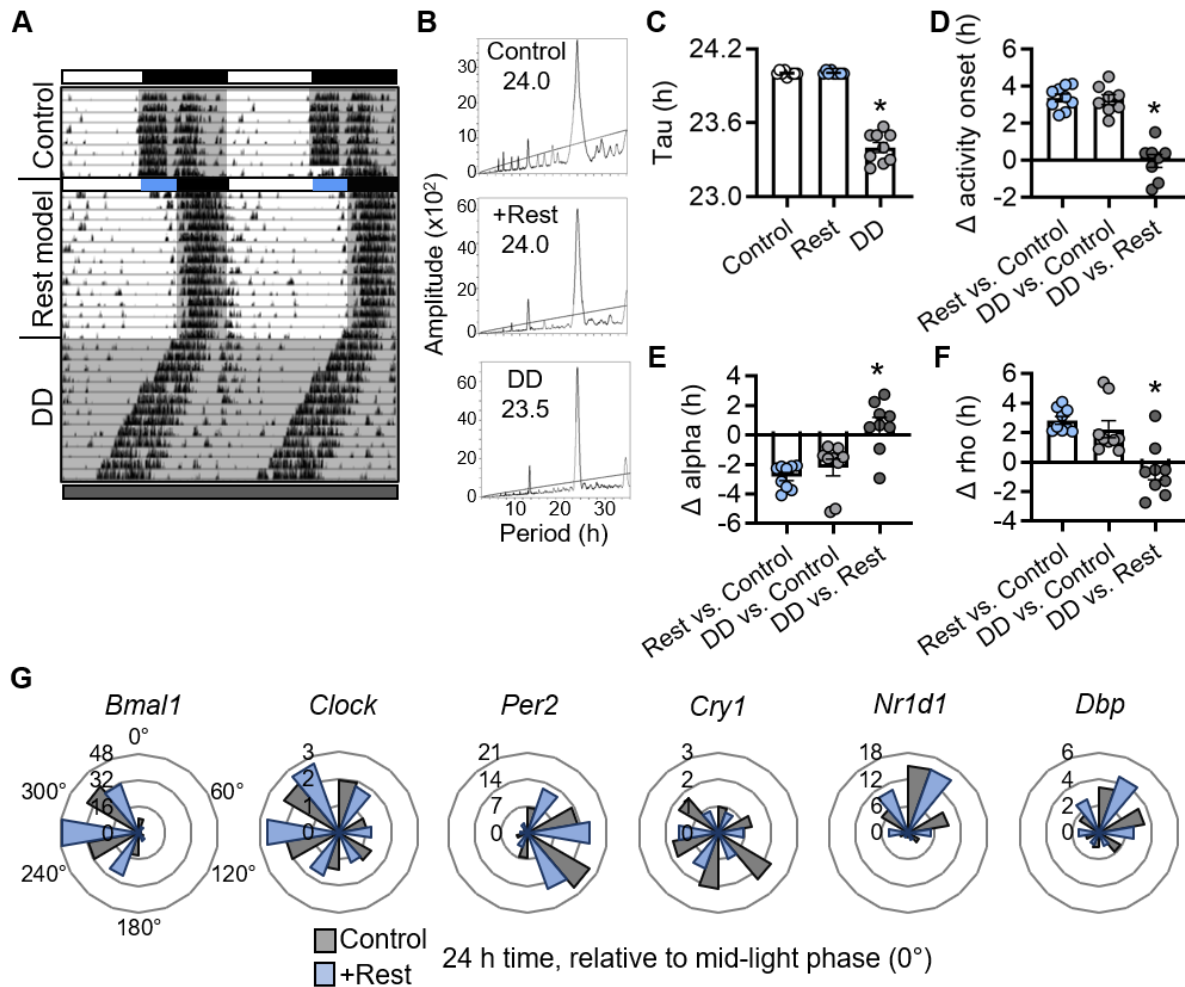

**Supplemental Figure 2. Physiologic and molecular rest patterns.** (A) Double-plotted actogram showing representative running wheel recording of mice under control (LD 12:12), the rest model (+Rest; LBD 12:4:8), and release into constant darkness (DD). Shaded areas represent the dark period. (B) Representative periodograms under control conditions (top), rest model (middle), and DD (bottom). (C) Quantitative analysis of tau, (D) change in activity onset, (E) change in alpha (active period), and (F) change in rho (inactive period), between control, +Rest, and the first 5 days of DD.  $n=9$  mice,  $*P<0.005$  vs. all other groups, by one-way repeated measures ANOVA and Tukey post-hoc test. (G) Radar plots of cardiac mRNA expression of core circadian clock mechanism genes in mice housed under control or the rest model (+Rest). Expression data (measured as qRT-PCR fold change) are plotted relative to the middle of the light phase under either control or rest conditions.  $n=3$  mice/timepoint/group. Data are represented as mean  $\pm$  s.e.m.

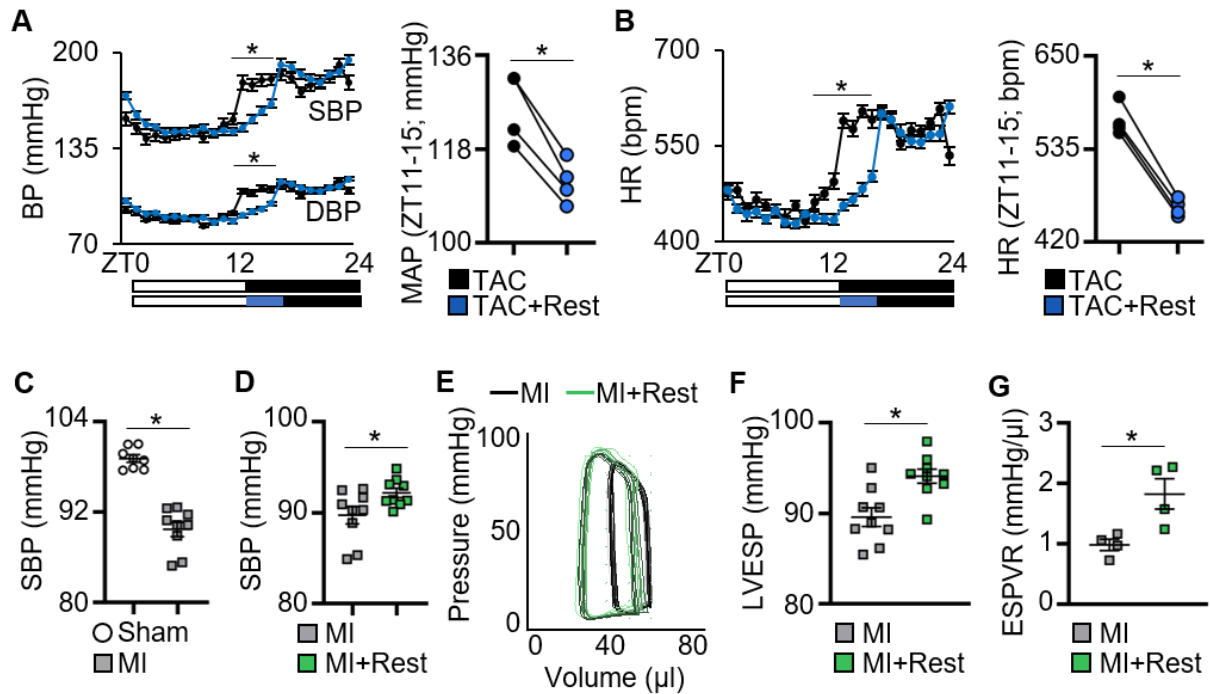

**Supplemental Figure 3. Rest alters cardiovascular hemodynamics to benefit cardiac contractility in a disease phenotype-specific manner.** (A) A short period of extended rest lowers cardiac afterload, as evidenced by diurnal systolic (SBP) and diastolic (DBP) blood pressure and quantification of MAP and (B) lowers cardiac workload, shown by reduced heart rate (HR) during rest, in TAC+Rest hearts vs. TAC controls, at 4 weeks post-surgery.  $n=4$  mice/group,  $*P<0.005$  TAC vs. TAC+Rest, paired Student's  $t$ -test. (C) MI lowers SBP as compared to sham mice, and (D) this is restored in mice maintained under the rest model up to 8 weeks post-MI. (E) MI+Rest hearts show better pressure-volume hemodynamic profiles in vivo, including (F) greater left ventricular end systolic pressures (LVESP), and (G) this is independent of preload, as evidenced by greater slope of the end-systolic pressure volume relationship.  $n=9$  mice/group.  $*P<0.05$  MI vs. MI+Rest, by unpaired Student's  $t$ -test. Data are represented as mean  $\pm$  s.e.m.

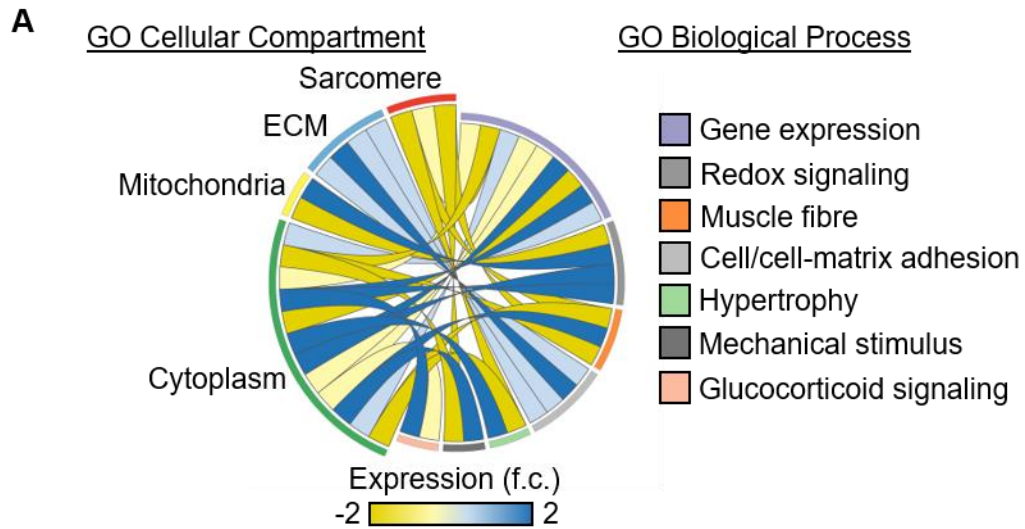

**Supplemental Figure 4. Rest gene biomarkers in the heart.** (A) Gene ontology (GO) cellular compartment and biological process correlations, illustrates genes up-regulated (blue) or down-regulated (yellow) in the heart with rest. Circos plot visualizes key biological processes regulated by rest that are involved in cardiac growth, repair, and remodeling and links to the subcellular compartments where these pathways are localized. ECM = extracellular matrix. n=3 hearts/group for microarray transcriptomics and bioinformatics analyses.

**Supplemental Table 1. Rest limits adverse cardiac remodeling in pressure overload-induced cardiac hypertrophy in mice.**

|                                    | TAC+Rest      | TAC         | Sham+Rest   | Sham        |
|------------------------------------|---------------|-------------|-------------|-------------|
| <b>Echocardiography (Baseline)</b> |               |             |             |             |
| LVIDd (mm)                         | 4.01±0.02     | 4.02±0.02   | 4.01±0.03   | 4.00±0.02   |
| LVIDs (mm)                         | 2.41±0.02     | 2.43±0.04   | 2.42±0.02   | 2.39±0.04   |
| EF (%)                             | 76.89±0.39    | 76.31±0.75  | 76.42±0.22  | 77.03±0.85  |
| FS (%)                             | 39.93±0.34    | 39.48±0.69  | 39.58±0.16  | 40.17±0.77  |
| HR (bpm)                           | 480±9         | 443±7       | 470±14      | 457±15      |
| <b>Echocardiography (4 weeks)</b>  |               |             |             |             |
| LVIDd (mm)                         | 4.28±0.07**   | 4.97±0.15   | 4.03±0.03   | 4.04±0.03   |
| LVIDs (mm)                         | 2.80±0.11**   | 3.74±0.18   | 2.40±0.03   | 2.42±0.02   |
| EF (%)                             | 70.25±1.87**  | 55.55±2.40  | 77.37±0.45  | 77.04±0.30  |
| FS (%)                             | 34.75±1.32**  | 25.13±1.40  | 40.34±0.40  | 40.04±0.26  |
| IVSd (mm)                          | 0.67 0.01*    | 0.70 0.01   | 0.62±0.01   | 0.62±0.01   |
| LVPWd (mm)                         | 0.67 0.01*    | 0.71 0.00   | 0.61±0.01   | 0.62±0.00   |
| HR (bpm)                           | 465±8         | 469±9       | 484±8       | 476±9       |
| <b>Morphometry (4 weeks)</b>       |               |             |             |             |
| HW (mg)                            | 142.36±6.61** | 193.55±8.47 | 115.45±4.33 | 114.64±4.01 |
| HW:BW (mg/g)                       | 5.67±0.23**   | 7.16±0.27   | 4.13±0.04   | 4.09±0.09   |
| HW:TL (mg/mm)                      | 7.34±0.39**   | 9.82±0.44   | 5.84±0.23   | 5.77±0.20   |

LVIDd, left ventricle internal dimensions at diastole; LVIDs, LV internal dimensions at systole; % EF, % ejection fraction; % FS, % fractional shortening; HR, heart rate; IVSd, interventricular septal wall thickness at diastole; LVPWd, left ventricular posterior wall thickness at diastole; HW, heart weight; HW:BW, HW:body weight ratio; HW:TL, HW:tibia length ratio. \* $P < 0.05$ , \*\* $P < 0.001$  TAC control vs. TAC+Rest, by unpaired Student's *t*-test. n=11 mice/group. Data are mean ± s.e.m.

**Supplemental Table 2. Rest benefits cardiac structure and function post-myocardial infarction in mice.**

|                                               | MI+Rest      | MI         |
|-----------------------------------------------|--------------|------------|
| <b>Echocardiography (Baseline)</b>            |              |            |
| LVIDd (mm)                                    | 4.01±0.03    | 4.00±0.01  |
| LVIDs (mm)                                    | 2.43±0.02    | 2.41±0.02  |
| EF (%)                                        | 76.45±0.31   | 76.55±0.28 |
| FS (%)                                        | 39.48±0.27   | 39.57±0.25 |
| HR (bpm)                                      | 458±12       | 438±7      |
| <b>Echocardiography (1 week)</b>              |              |            |
| LVIDd (mm)                                    | 4.91±0.06    | 4.91±0.07  |
| LVIDs (mm)                                    | 3.53±0.06    | 3.63±0.08  |
| EF (%)                                        | 61.05±0.87*  | 57.84±1.04 |
| FS (%)                                        | 28.23±0.55*  | 26.22±0.64 |
| HR (bpm)                                      | 458±9        | 460±9      |
| <b>Echocardiography (4 weeks)</b>             |              |            |
| LVIDd (mm)                                    | 5.15±0.07    | 5.23±0.08  |
| LVIDs (mm)                                    | 3.75±0.07    | 3.95±0.09  |
| EF (%)                                        | 59.24±0.77*  | 55.04±1.14 |
| FS (%)                                        | 27.12±0.48*  | 24.61±0.65 |
| HR (bpm)                                      | 473±12       | 474±6      |
| <b>Echocardiography (8 weeks)</b>             |              |            |
| LVIDd (mm)                                    | 5.18±0.07*   | 5.42±0.08  |
| LVIDs (mm)                                    | 3.84±0.06*   | 4.18±0.09  |
| EF (%)                                        | 57.46±0.52** | 52.23±1.10 |
| FS (%)                                        | 26.00±0.31** | 23.00±0.61 |
| HR (bpm)                                      | 471±12       | 450±9      |
| <b>Pressure-volume hemodynamics (8 weeks)</b> |              |            |
| SBP (mmHg)                                    | 92.20±0.51*  | 89.74±0.95 |
| DBP (mmHg)                                    | 62.30±1.27   | 59.58±1.00 |
| MAP (mmHg)                                    | 71.54±0.87*  | 68.93±0.79 |
| LVESP (mmHg)                                  | 94.12±0.78*  | 89.60±1.02 |
| LVEDP (mmHg)                                  | 0.58±0.98    | 3.11±1.71  |
| LVESV (μl)                                    | 25.50±1.50*  | 38.23±2.82 |
| LVEDV (μl)                                    | 48.91±1.56*  | 57.38±2.62 |
| SV (μl)                                       | 23.41±0.99*  | 19.14±0.53 |
| CO (mL/min)                                   | 11.73±0.37*  | 9.86±0.29  |
| dP/dt <sub>max</sub> (mmHg/sec)               | 7346±350*    | 6162±244   |
| dP/dt <sub>min</sub> (mmHg/sec)               | -6885±296*   | -5542±351  |
| ESPVR slope (mmHg/μl)                         | 1.83±0.25*   | 0.98±0.09  |
| HR (bpm)                                      | 507±23       | 517±15     |

LVIDd, left ventricle internal dimensions at diastole; LVIDs, LV internal dimensions at systole; % EF, % ejection fraction; % FS, % fractional shortening; HR, heart rate; SBP, systolic blood pressure; DBP, diastolic blood pressure; MAP, mean arterial pressure; LVESP, left ventricular end systolic pressure; LVEDP, left ventricular end diastolic pressure; LVESV, left ventricular end systolic volume; LVEDV, left ventricular end diastolic volume; SV, stroke volume; CO, cardiac output; dP/dt<sub>max</sub> and dP/dt<sub>min</sub>, maximum and minimum first derivative of LV pressure; ESPVR, end systolic pressure-volume relationship; HW, heart weight; HW:BW, HW:body weight ratio; HW:TL, HW:tibia length ratio. \**P*<0.05, \*\**P*<0.001 MI control vs. MI+Rest, by unpaired Student's *t*-test. n=10 mice/group for echocardiography, n=9 mice/group for hemodynamics and morphometry. Data are mean ± s.e.m.

**Supplemental Table 3. Rest in *Clock*<sup>A19/19</sup> mice with heart disease.**

|                                    | <i>Clock</i> <sup>A19/19</sup><br>TAC+Rest | <i>Clock</i> <sup>A19/19</sup><br>TAC | <i>Clock</i> <sup>A19/19</sup><br>Sham+Rest | <i>Clock</i> <sup>A19/19</sup><br>Sham |
|------------------------------------|--------------------------------------------|---------------------------------------|---------------------------------------------|----------------------------------------|
| <b>Echocardiography (Baseline)</b> |                                            |                                       |                                             |                                        |
| LVIDd (mm)                         | 3.90±0.02                                  | 3.92±0.02                             | 3.96±0.04                                   | 3.95±0.02                              |
| LVIDs (mm)                         | 2.31±0.01                                  | 2.32±0.01                             | 2.36±0.01                                   | 2.35±0.01                              |
| EF (%)                             | 78.05±0.14                                 | 77.97±0.08                            | 77.61±0.26                                  | 77.69±0.27                             |
| FS (%)                             | 40.86±0.13                                 | 40.78±0.08                            | 40.48±0.25                                  | 40.54±0.24                             |
| HR (bpm)                           | 450±4                                      | 440±4                                 | 469±10                                      | 457±8                                  |
| <b>Echocardiography (4 weeks)</b>  |                                            |                                       |                                             |                                        |
| LVIDd (mm)                         | 4.14±0.03*                                 | 4.40±0.07                             | 4.01±0.03                                   | 4.04±0.03                              |
| LVIDs (mm)                         | 2.69±0.05*                                 | 3.03±0.08                             | 2.39±0.02                                   | 2.41±0.02                              |
| EF (%)                             | 71.02±0.94*                                | 65.69±1.00                            | 77.50±0.11                                  | 77.51±0.08                             |
| FS (%)                             | 35.05±0.74*                                | 31.21±0.67                            | 40.38±0.10                                  | 40.39±0.06                             |
| IVSd (mm)                          | 0.80±0.01*                                 | 0.83±0.01                             | 0.63±0.01                                   | 0.63±0.01                              |
| LVPWd (mm)                         | 0.79±0.01*                                 | 0.82±0.01                             | 0.63±0.01                                   | 0.63±0.01                              |
| HR (bpm)                           | 456±5                                      | 453±7                                 | 457±9                                       | 459±5                                  |
| <b>Morphometry (4 weeks)</b>       |                                            |                                       |                                             |                                        |
| HW (mg)                            | 192.00±8.21                                | 217.63±12.13                          | 126.00±1.34                                 | 128.80±1.24                            |
| HW:BW (mg/g)                       | 6.81±0.24*                                 | 7.99±0.40                             | 4.50±0.06                                   | 4.35±0.06                              |
| HW:TL (mg/mm)                      | 9.24±0.39                                  | 10.44±0.54                            | 6.12±0.04                                   | 6.18±0.05                              |

LVIDd, left ventricle internal dimensions at diastole; LVIDs, LV internal dimensions at systole; % EF, % ejection fraction; % FS, % fractional shortening; HR, heart rate; IVSd, interventricular septal wall thickness at diastole; LVPWd, left ventricular posterior wall thickness at diastole; HW, heart weight; HW:BW, HW:body weight ratio; HW:TL, HW:tibia length ratio. \**P*<0.05 *Clock*<sup>A19/19</sup> TAC vs. *Clock*<sup>A19/19</sup> TAC+Rest, by unpaired Student's *t*-test. n=5 mice/group for sham, n=7-9 mice/group for TAC. Data are mean ± s.e.m.

**Supplemental Table 4. Rest gene cassette.**

| <b>Transcript ID</b> | <b>Gene Symbol</b> | <b>Gene Description</b>                                       | <b>Rest</b> | <b>Control</b> | <b>Fold Change (Rest vs. Control)</b> | <b>Entrez Gene ID</b> |
|----------------------|--------------------|---------------------------------------------------------------|-------------|----------------|---------------------------------------|-----------------------|
| 17548055             | BC023105           |                                                               | 0.92        | -0.50          | 2.66                                  | 667597                |
| 17296489             | Nnt                | Nicotinamide nucleotide transhydrogenase                      | 0.18        | -0.97          | 2.22                                  | 18115                 |
| 17354589             | Gm4841             | Predicted gene 4841                                           | 0.75        | -0.25          | 2.00                                  | 225594                |
| 17481960             | Arntl              | Aryl hydrocarbon receptor nuclear translocator-like           | 0.45        | -0.47          | 1.90                                  | 11865                 |
| 17350932             | BC023105           |                                                               | 0.63        | -0.26          | 1.86                                  | 667597                |
| 17421540             | Nppb               | Natriuretic peptide type B                                    | 0.33        | -0.55          | 1.84                                  | 18158                 |
| 17212087             | Npas2              | Neuronal PAS domain protein 2                                 | 0.39        | -0.43          | 1.77                                  | 18143                 |
| 17324835             | Tfrc               | Transferrin receptor                                          | 0.41        | -0.36          | 1.71                                  | 22042                 |
| 17424088             | Mir5123            | microRNA 5123                                                 | 0.33        | -0.38          | 1.64                                  | 100628614             |
| 17464061             | Gm10400            | Predicted gene 10400                                          | 0.33        | -0.33          | 1.58                                  | 100093700             |
| 17548256             |                    |                                                               | 0.09        | -0.54          | 1.54                                  |                       |
| 17457318             | Mir490             | microRNA 490                                                  | 0.20        | -0.41          | 1.53                                  | 735279                |
| 17350921             | F830016B08<br>Rik  | RIKENcDNAF830016B08 gene                                      | 0.51        | -0.08          | 1.51                                  | 240328                |
| 17424092             | Gm25931            | Predicted gene, 25931 [Source: MGI Symbol; Acc: MGI: 5455708] | 0.35        | -0.24          | 1.51                                  |                       |
| 17281084             | Egln3              | egl-9 family hypoxia-inducible factor 3                       | 0.30        | -0.28          | 1.49                                  | 112407                |
| 17332228             | Rcan1              | Regulator of calcineurin 1                                    | 0.27        | -0.30          | 1.49                                  | 54720                 |
| 17438963             | Ppbp               | pro-platelet basic protein                                    | 0.42        | -0.14          | 1.47                                  | 57349                 |
| 17249980             | Igtp               | Interferon gamma induced GTPase                               | 0.35        | -0.20          | 1.47                                  | 16145                 |
| 17385654             | Itgb6              | Integrin beta 6                                               | 0.23        | -0.28          | 1.42                                  | 16420                 |
| 17376549             | Prnd               | Prion protein dublet   prion protein gene complex             | 0.19        | -0.29          | 1.40                                  | 26434 / 111368        |
| 17510040             | Crtc1              | CREB regulated transcription coactivator 1                    | 0.24        | -0.24          | 1.39                                  | 382056                |
| 17222193             | Ankrd23            | Ankyrin repeat domain 23                                      | 0.33        | -0.14          | 1.39                                  | 78321                 |
| 17450501             | Gbp10              | guanylate-binding protein 10                                  | 0.25        | -0.22          | 1.38                                  | 626578                |
| 17392722             |                    |                                                               | 0.38        | -0.09          | 1.38                                  |                       |
| 17550156             |                    |                                                               | 0.38        | -0.09          | 1.38                                  |                       |
| 17381509             | 5031426D15<br>Rik  | RIKENcDNA5031426D15 gene                                      | 0.17        | -0.29          | 1.38                                  | 68144                 |
| 17261107             | Rel                | Reticuloendotheliosis oncogene                                | 0.18        | -0.28          | 1.38                                  | 19696                 |
| 17266563             | Wsb1               | WD repeat and SOCS box-containing 1                           | 0.28        | -0.18          | 1.37                                  | 78889                 |



|          |                |                                                               |       |       |       |        |
|----------|----------------|---------------------------------------------------------------|-------|-------|-------|--------|
| 17534892 | Zfp449         | Zinc finger protein 449                                       | 0.25  | -0.21 | 1.37  | 78619  |
| 17280817 | Scin           | scinderin                                                     | 0.27  | -0.18 | 1.37  | 20259  |
| 17520073 | Nt5e           | 5'-nucleotidase, ecto                                         | 0.22  | -0.22 | 1.36  | 23959  |
| 17548472 |                |                                                               | 0.15  | -0.29 | 1.36  |        |
| 17474932 |                |                                                               | 0.32  | -0.11 | 1.35  |        |
| 17248754 | Adam19         | A disintegrin and metallopeptidase domain 19 (meltrin beta)   | 0.19  | -0.24 | 1.34  | 11492  |
| 17341540 | Tnfrsf12a      | Tumor necrosis factor receptor superfamily, member 12a        | 0.20  | -0.23 | 1.34  | 27279  |
| 17227910 | Hmcn1          | Hemicentin 1                                                  | 0.19  | -0.23 | 1.34  | 545370 |
| 17456934 | Mest           | Mesoderm specific transcript                                  | 0.25  | -0.16 | 1.33  | 17294  |
| 17229307 | Dusp27         | Dual specificity phosphatase 27 (putative)                    | 0.18  | -0.23 | 1.33  | 240892 |
| 17232235 | Ctgf           | Connective tissue growth factor                               | 0.15  | -0.25 | 1.32  | 14219  |
| 17438189 | Rasl11b        | RAS-like, family 11, member B                                 | 0.22  | -0.18 | 1.32  | 68939  |
| 17550246 |                |                                                               | 0.21  | -0.19 | 1.32  |        |
| 17245433 | Msrb3          | Methionine sulfoxide reductase B3                             | 0.18  | -0.22 | 1.32  | 320183 |
| 17472598 | C2cd5          | C2 calcium-dependent domain containing 5                      | 0.25  | -0.15 | 1.32  | 74741  |
| 17317307 | Gm24041        | Predicted gene, 24041 [Source: MGI Symbol; Acc: MGI: 5453818] | 0.13  | -0.27 | 1.32  |        |
| 17490149 | Cd33           | CD33 antigen                                                  | 0.14  | -0.26 | 1.32  | 12489  |
| 17426784 | 2310067E19 Rik | RIKENcDNA2310067E19 gene                                      | 0.18  | -0.22 | 1.32  | 76455  |
| 17267632 | Dgke           | Diacylglycerol kinase, epsilon                                | 0.20  | -0.19 | 1.31  | 56077  |
| 17315686 | C7             | Complement component 7                                        | 0.11  | -0.28 | 1.31  | 109828 |
| 17267420 | Ypel2          | yippee-like 2 (Drosophila)                                    | 0.17  | -0.22 | 1.30  | 77864  |
| 17238934 | Syne1          | Spectrin repeat containing, nuclear envelope 1                | 0.07  | -0.31 | 1.30  | 64009  |
| 17381515 | Gm10115        | Predicted gene 10115 [Source: MGI Symbol; Acc: MGI: 3641675]  | 0.12  | -0.26 | 1.30  |        |
| 17302588 | Gm23437        | Predicted gene, 23437 [Source: MGI Symbol; Acc: MGI: 5453214] | -0.32 | 0.05  | -1.30 |        |
| 17364986 | Gm24400        | Predicted gene, 24400 [Source: MGI Symbol; Acc: MGI: 5454177] | -0.22 | 0.16  | -1.30 |        |

|          |                         |                                                                                                                                                                                  |       |      |       |           |
|----------|-------------------------|----------------------------------------------------------------------------------------------------------------------------------------------------------------------------------|-------|------|-------|-----------|
| 17339987 | Gm24240                 | Predicted gene, 24240<br>[Source: MGI Symbol;<br>Acc: MGI: 5454017]                                                                                                              | -0.18 | 0.21 | -1.31 |           |
| 17326944 | LOC102637417<br> Gm7735 | keratin-associated protein<br>20-2-like   predicted gene<br>7735 [Source: MGI<br>Symbol; Acc: MGI:<br>3649168]                                                                   | -0.28 | 0.10 | -1.31 | 102637417 |
| 17532629 | mt-Ts2 <br>mt-Tl2       | Mitochondrially encoded<br>tRNA serine 2 [Source:<br>MGI Symbol; Acc:<br>MGI:102474]  <br>mitochondrially encoded<br>tRNA leucine 2 [Source:<br>MGI Symbol; Acc: MGI:<br>102481] | -0.02 | 0.36 | -1.31 |           |
| 17268884 | Nr1d1                   | Nuclear receptor<br>subfamily 1, group D,<br>member 1                                                                                                                            | -0.13 | 0.26 | -1.31 | 217166    |
| 17366918 | Mir466d                 | microRNA 466d                                                                                                                                                                    | -0.14 | 0.25 | -1.32 | 100124465 |
| 17475777 | Fbl                     | fibrillarlin                                                                                                                                                                     | -0.17 | 0.23 | -1.32 | 14113     |
| 17532593 | mt-Tf                   | Mitochondrially encoded<br>tRNA phenylalanine<br>[Source: MGI Symbol;<br>Acc: MGI: 102487]                                                                                       | -0.28 | 0.14 | -1.33 |           |
| 17550382 |                         |                                                                                                                                                                                  | -0.18 | 0.24 | -1.34 |           |
| 17532489 |                         |                                                                                                                                                                                  | -0.21 | 0.22 | -1.35 |           |
| 17303625 | Nr1d2                   | Nuclear receptor<br>subfamily 1, group D,<br>member 2                                                                                                                            | -0.27 | 0.18 | -1.36 | 353187    |
| 17407188 | Gm24046                 | Predicted gene, 24046<br>[Source: MGI Symbol;<br>Acc: MGI: 5453823]                                                                                                              | -0.10 | 0.36 | -1.37 |           |
| 17364098 | Acta2                   | Actin, alpha 2, smooth<br>muscle, aorta                                                                                                                                          | -0.17 | 0.30 | -1.38 | 11475     |
| 17340673 | Fndc1                   | Fibronectin type III<br>domain containing 1                                                                                                                                      | -0.24 | 0.22 | -1.38 | 68655     |
| 17472760 | Bhlhe41                 | Basic helix-loop-helix<br>family, member e41                                                                                                                                     | -0.20 | 0.27 | -1.38 | 79362     |
| 17280479 | Gm25865                 | Predicted gene, 25865<br>[Source: MGI Symbol;<br>Acc: MGI: 5455642]                                                                                                              | -0.24 | 0.23 | -1.39 |           |
| 17550004 |                         |                                                                                                                                                                                  | -0.24 | 0.23 | -1.39 |           |
| 17251527 | Per1                    | Period circadian clock 1                                                                                                                                                         | -0.26 | 0.21 | -1.39 | 18626     |
| 17548916 |                         |                                                                                                                                                                                  | -0.29 | 0.21 | -1.42 |           |
| 17511693 | Ces1d                   | Carboxylesterase 1D                                                                                                                                                              | -0.30 | 0.21 | -1.43 | 104158    |
| 17503937 | Mt2                     | Metallothionein 2                                                                                                                                                                | -0.17 | 0.37 | -1.45 | 17750     |

|          |                     |                                                                                                                                  |       |      |       |                  |
|----------|---------------------|----------------------------------------------------------------------------------------------------------------------------------|-------|------|-------|------------------|
| 17461414 | Bhlhe40             | Basic helix-loop-helix family, member e40                                                                                        | -0.18 | 0.36 | -1.46 | 20893            |
| 17255987 | Tcap                | titin-cap                                                                                                                        | -0.28 | 0.28 | -1.47 | 21393            |
| 17464654 | Pdk4                | Pyruvate dehydrogenase kinase, isoenzyme 4                                                                                       | -0.27 | 0.37 | -1.56 | 27273            |
| 17513995 | Acta1               | actin, alpha 1, skeletal muscle                                                                                                  | -0.36 | 0.28 | -1.56 | 11459            |
| 17212874 | Coq10b              | Coenzyme Q10 homolog B ( <i>S. cerevisiae</i> )                                                                                  | -0.35 | 0.30 | -1.57 | 67876            |
| 17400862 | Hmgcs2              | 3-hydroxy-3-methylglutaryl-Coenzyme A synthase 2                                                                                 | -0.40 | 0.26 | -1.58 | 15360            |
| 17219206 | Gm26110             | Predicted gene, 26110 [Source: MGI Symbol; Acc: MGI: 5455887]                                                                    | -0.12 | 0.56 | -1.61 |                  |
| 17400568 | Rnu1b6              | U1b6 small nuclear RNA                                                                                                           | -0.12 | 0.56 | -1.61 | 19847            |
| 17400579 | Rnu1b1 <br>Rnu1b2   | U1b1 small nuclear RNA  <br>U1b2 small nuclear RNA                                                                               | -0.12 | 0.56 | -1.61 | 19844 /<br>19845 |
| 17400588 | Rnu1b6              | U1b6 small nuclear RNA                                                                                                           | -0.12 | 0.56 | -1.61 | 19847            |
| 17400590 | Gm25890 <br>Gm22614 | Predicted gene, 25890 [Source: MGI Symbol; Acc: MGI: 5455667]  <br>predicted gene, 22614 [Source: MGI Symbol; Acc: MGI: 5452391] | -0.12 | 0.56 | -1.61 |                  |
| 17408038 | Rnu1b1 <br>Rnu1b2   | U1b1 small nuclear RNA  <br>U1b2 small nuclear RNA                                                                               | -0.12 | 0.56 | -1.61 | 19844 /<br>19845 |
| 17408063 | Rnu1b6              | U1b6 small nuclear RNA                                                                                                           | -0.12 | 0.56 | -1.61 | 19847            |
| 17408065 | Gm25890 <br>Gm22614 | Predicted gene, 25890 [Source: MGI Symbol; Acc: MGI: 5455667]  <br>predicted gene, 22614 [Source: MGI Symbol; Acc: MGI: 5452391] | -0.12 | 0.56 | -1.61 |                  |
| 17425278 | Gm22042             | predictedgene,22042 [Source: MGI Symbol; Acc: MGI: 5451819]                                                                      | -0.12 | 0.56 | -1.61 |                  |
| 17480729 | Ucp3                | Uncoupling protein 3 (mitochondrial, proton carrier)                                                                             | -0.31 | 0.39 | -1.61 | 22229            |
| 17520288 | Gm22866             | predictedgene,22866 [Source: MGI Symbol; Acc: MGI: 5452643]                                                                      | -0.18 | 0.63 | -1.75 |                  |
| 17477979 | Dbp                 | D site albumin promoter binding protein                                                                                          | -0.52 | 0.57 | -2.12 | 13170            |

Microarray data from hearts collected at ZT07, n=3 hearts/group. Data show the mean normalized expression and mean fold change between groups.

**Supplemental Table 5. GEO datasets of human myocardial tissue gene expression.**

| <b>GEO Accession</b> | <b>Patient Cohort</b>                                                                                       | <b>Tissue</b> | <b>Microarray Platform</b>                  | <b>Ref.</b>                                                |
|----------------------|-------------------------------------------------------------------------------------------------------------|---------------|---------------------------------------------|------------------------------------------------------------|
| GSE1145              | Aortic stenosis and LV hypertrophy (n=7)<br>Control (coronary artery disease with normal LV function) (n=4) | LV biopsy     | Affymetrix Human Genome U95 Version 2 Array | -                                                          |
| GSE10161             | Aortic stenosis (n=20)<br>Control (n=7)                                                                     | LV biopsy     | Affymetrix Human Genome U133A Array         | Petretto et al. <i>Nat Genet.</i> 2008;40(5):546-52        |
| GSE3585              | Dilated cardiomyopathy (n=7)<br>Non-failing control (n=5)                                                   | LV biopsy     | Affymetrix Human Genome U133A Array         | Barth et al. <i>J Am Coll Cardiol.</i> 2006;48(8):1610-7   |
| GSE42955             | Dilated cardiomyopathy (n=12)<br>Ischemic cardiomyopathy (n=12)<br>Control (n=5)                            | LV biopsy     | Affymetrix Human Gene 1.0 ST Array          | Molina-Navarro et al. <i>PLoS One.</i> 2013;8(12):e79792   |
| GSE79962             | Dilated cardiomyopathy (n=9)<br>Ischemic heart disease (n=11)<br>Non-failing donors (n=11)                  | LV biopsy     | Affymetrix Human Gene 1.0 ST Array          | Matkovich et al. <i>Crit Care Med.</i> 2017;45(3):407-414  |
| GSE16499             | Ischemic heart failure (n=15)<br>Non-failing control (n=15)                                                 | LV biopsy     | Affymetrix Human Exon 1.0 ST Array          | Kong et al. <i>Circ Cardiovasc Genet.</i> 2010;3(2):138-46 |

**Supplemental Table 6. Commonly prescribed cardiac medications listed by the American Heart Association target rest-responsive genes in the heart.**

| <b>Drug Class</b>                          | <b>Drug Name (generic)</b>     | <b>Major Trade Name</b> | <b>Rhythmic Genes (Murine heart, CircaDB)</b>                                            | <b>Rest-responsive Genes (Rest model, murine heart microarrays)</b> |
|--------------------------------------------|--------------------------------|-------------------------|------------------------------------------------------------------------------------------|---------------------------------------------------------------------|
| Anticoagulants                             | Apixaban                       | Eliquis                 | <i>Abcb1a, Abcg2</i>                                                                     | <i>Abcb1a</i>                                                       |
|                                            | Dabigatran                     | Pradaxa                 | <i>Abcb1a, Ces1</i>                                                                      | <i>Abcb1a, Ces1</i>                                                 |
|                                            | Heparin                        | various                 | <i>Ccl5, Fgfr1, Fgfr4, Hgf, Vegfa</i>                                                    | <i>Fgfr4, Hgf, Vegfa</i>                                            |
|                                            | Rivaroxaban                    | Xarelto                 | <i>Abcb1a, Abcg2</i>                                                                     | <i>Abcb1a</i>                                                       |
|                                            | Warfarin                       | Coumadin                | <i>Cyp1a1</i>                                                                            | -                                                                   |
| Antiplatelet Agents                        | Aspirin                        |                         | <i>Abcb1a, Ccna2, Ednra, Hsp5a, Mapk6, Nfkb1, Nfkbia, Prkaa1, Prkab1, Ptgs1, Rps6ka3</i> | <i>Abcb1a, Ccna2, Ccnd1, Hspa5, Mapk6, Prkaa2</i>                   |
|                                            | Clopidogrel                    | Plavix                  | <i>Abcb1a, Ces1</i>                                                                      | <i>Abcb1a, Ces1, Slc22a2</i>                                        |
|                                            | Dipyridamole                   |                         | <i>Abcb1a, Abcc5, Pde4a, Rcan1, Slco2b1</i>                                              | <i>Abcb11, Abcb1a, Abcc5, Rcan1</i>                                 |
|                                            | Prasugrel                      | Effient                 | -                                                                                        | -                                                                   |
|                                            | Ticagrelor                     | Brilinta                | <i>Abcb1a</i>                                                                            | <i>Abcb1a</i>                                                       |
| ACE Inhibitors                             | Benazepril                     | Lotensin                | <i>Ace, Mthfr</i>                                                                        | -                                                                   |
|                                            | Captopril                      | Capoten                 | <i>Abcb1a, Ace</i>                                                                       | <i>Abcb1a, Lta4h</i>                                                |
|                                            | Enalapril                      | Vasotec                 | <i>Abcb1a, Ace</i>                                                                       | <i>Abcb1a</i>                                                       |
|                                            | Fosinopril                     | Monopril                | <i>Ace</i>                                                                               | -                                                                   |
|                                            | Lisinopril                     | Prinivil/Zestril        | <i>Ace</i>                                                                               | -                                                                   |
|                                            | Moexipril                      | Univasc                 | <i>Ace, Ace2</i>                                                                         | -                                                                   |
|                                            | Perindopril                    | Aceon                   | <i>Ace</i>                                                                               | -                                                                   |
|                                            | Quinapril                      | Accupril                | <i>Ace</i>                                                                               | -                                                                   |
|                                            | Ramipril                       | Altace                  | <i>Ace</i>                                                                               | -                                                                   |
| Trandolapril                               | Mavik                          | <i>Ace, Ces1</i>        | <i>Ces1</i>                                                                              |                                                                     |
| Angiotensin II Receptor Blockers           | Candesartan                    | Atacand                 | <i>Abcb1a, Agtr1a, Ptgs1</i>                                                             | <i>Abcb1a</i>                                                       |
|                                            | Eprosartan                     | Teveten                 | <i>Agtr1a</i>                                                                            | -                                                                   |
|                                            | Irbesartan                     | Avapro                  | <i>Agtr1a, Jun, Ptgs1</i>                                                                | -                                                                   |
|                                            | Losartan                       | Cozaar                  | <i>Abcb1a, Agtr1a</i>                                                                    | <i>Abcb11, Abcb1a</i>                                               |
|                                            | Telmisartan                    | Micardis                | <i>Abcb1a, Abcg2, Agtr1a</i>                                                             | <i>Abcb11, Abcb1a</i>                                               |
|                                            | Valsartan                      | Diovan                  | <i>Agtr1a</i>                                                                            | -                                                                   |
| Angiotensin-Receptor Neprilysin Inhibitors | Sacubitril/valsartan           | Entresto                | -                                                                                        | -                                                                   |
| Beta Blockers                              | Acebutolol                     | Sectral                 | <i>Abcb1a, Adrb1</i>                                                                     | <i>Abcb1a</i>                                                       |
|                                            | Atenolol                       | Tenormin                | <i>Adrb1</i>                                                                             | <i>Abcb11</i>                                                       |
|                                            | Betaxolol                      | Kerlone                 | <i>Adrb1</i>                                                                             | -                                                                   |
|                                            | Bisoprolol/hydrochlorothiazide | Ziac                    | <i>Abcb1a, Adrb1</i>                                                                     | <i>Abcb1a</i>                                                       |
|                                            | Bisoprolol                     | Zebeta                  | <i>Abcb1a, Adrb1</i>                                                                     | <i>Abcb1a</i>                                                       |
|                                            | Metoprolol                     | Lopressor/Toprol XL     | <i>Abcb1a, Adrb1</i>                                                                     | <i>Abcb1a, Slc22a2</i>                                              |
|                                            | Nadolol                        | Corgard                 | <i>Abcb1a, Adrb1</i>                                                                     | <i>Abcb1a</i>                                                       |
|                                            | Propranolol                    | Inderal                 | <i>Abcb1a, Adrb1, Cyp1a1</i>                                                             | <i>Abcb1a, Slc22a2</i>                                              |
|                                            | Sotalol                        | Betapace                | <i>Adrb1, Kcnh2</i>                                                                      | -                                                                   |

|                                  |                             |                     |                                                                                                          |                                                         |
|----------------------------------|-----------------------------|---------------------|----------------------------------------------------------------------------------------------------------|---------------------------------------------------------|
| Combined Alpha and Beta Blockers | Carvedilol                  | Coreg               | <i>Abcb1a, Adra1a, Adra1d, Adrb1, Cyp1a1, Gjal, Hif1a, Kcnh2, Ndufc2, Nppb, Ptgs1, Vcam1, Vegfa, Xdh</i> | <i>Abcb1a, Gjal, Hif1a, Nppb, Vcam1, Vegfa</i>          |
|                                  | Labetalol hydrochloride     | Normodyne/Trandate  | <i>Adra1a, Adra1d, Adrb1</i>                                                                             | -                                                       |
| Calcium Channel Blockers         | Amlodipine                  | Norvasc/Lotrel      | <i>Abcb1a, Cyp1a1, Nos2</i>                                                                              | <i>Abcb1a, Cacna1c</i>                                  |
|                                  | Diltiazem                   | Cardizem/Tiazac     | <i>Abcb1a</i>                                                                                            | <i>Abcb1a, Cacna1c</i>                                  |
|                                  | Felodipine                  | Plendil             | <i>Abcb1a, Cacnb2, Calm2, Calm3, Nr3c2, Pde1b</i>                                                        | <i>Abcb11, Abcb1a, Cacna1c, Tnnc2</i>                   |
|                                  | Nifedipine                  | Adalat/Procardia    | <i>Abcb1a, Cacnb2, Calm2, Calm3, Cyp1a1</i>                                                              | <i>Abcb11, Abcb1a, Cacna1c</i>                          |
|                                  | Nimodipine                  | Nimotop             | <i>Cacnb2, Cacnb3, Cacnb4, Nr3c2</i>                                                                     | <i>Cacna1c, Cacnb3, Cacnb4</i>                          |
|                                  | Nisoldipine                 | Sular               | <i>Abcb1a, Cacnb2</i>                                                                                    | <i>Abcb1a, Cacna1c</i>                                  |
|                                  | Verapamil                   | Calan/Verelan       | <i>Abcb1a, Abcc1, Abcg2, Adra1a, Adra1d, Cacnb2, Cacnb3, Cacnb4, Kcnh2, Scn5a</i>                        | <i>Abcb11, Abcb1a, Cacna1c, Cacnb3, Cacnb4, Slc22a5</i> |
| Cholesterol-lowering Medications | Atorvastatin                | Lipitor             | <i>Abcb1a, Abcc1, Abcc5, Slco2b1</i>                                                                     | <i>Abcb11, Abcb1a, Abcc5, Dpp4</i>                      |
|                                  | Digitoxin                   |                     | <i>Abcb1a</i>                                                                                            | <i>Abcb1a, Cyp11a1</i>                                  |
|                                  | Digoxin                     | Lanoxin             | <i>Abcb1a</i>                                                                                            | <i>Abcb11, Abcb1a, Cyp11a1</i>                          |
|                                  | Ezetimibe/Simvastatin       | Vytorin             | <i>Abcb1a, Abcg2</i>                                                                                     | <i>Abcb11, Abcb1a</i>                                   |
|                                  | Lovastatin                  | Advicor             | <i>Abcb1a</i>                                                                                            | <i>Abcb11, Abcb1a</i>                                   |
|                                  | Rosuvastatin<br>Simvastatin | Crestor<br>Zocor    | <i>Abcc1, Abcg2, Slco2b1</i><br><i>Abcb1a</i>                                                            | <i>Abcb11, Slc7a11</i><br><i>Abcb11, Abcb1a</i>         |
| Diuretics                        | Amiloride                   | Midamor             | <i>Scnn1g</i>                                                                                            | <i>Scnn1a, Slc22a2</i>                                  |
|                                  | Bumetanide                  | Bumex               | <i>Slc12a4</i>                                                                                           | -                                                       |
|                                  | Chlorothiazide              | Diuril              | -                                                                                                        | -                                                       |
|                                  | Chlorthalidone              | Hygroton            | -                                                                                                        | -                                                       |
|                                  | Furosemide                  | Lasix               | <i>Pgd, Slco2a1</i>                                                                                      | <i>Slc22a5</i>                                          |
|                                  | Hydrochlorothiazide         | Esidrix/Hydrodiuril | -                                                                                                        | -                                                       |
|                                  | Indapamide                  | Lozol               | -                                                                                                        | -                                                       |
|                                  | Spironolactone              | Aldactone           | <i>Abcb1a, Nr3c1, Nr3c2</i>                                                                              | <i>Abcb11, Abcb1a, Cacna1c, Srd5a1</i>                  |
| Vasodilators                     | Hydralazine                 | Apresoline          | <i>P4ha1</i>                                                                                             | <i>P4ha1</i>                                            |
|                                  | Isosorbide dinitrate        | Isordil             | -                                                                                                        | -                                                       |
|                                  | Minoxidil                   | Loniten             | <i>Ptgs1</i>                                                                                             | <i>Ren1</i>                                             |
|                                  | Nesiritide                  | Natrecor            | <i>Npr2, Npr3</i>                                                                                        | -                                                       |
|                                  | Nitroglycerin               | Nitrostat           | -                                                                                                        | -                                                       |
|                                  | Nitroprusside               | Nitropress          | <i>Cyp1a1</i>                                                                                            | -                                                       |
